15. Chan YH, Tsai WC, Ko JS, Yin D, Chang PC, Rubart M et al. Small-conductance calcium-activated potassium current is activated during hypokalemia and masks short-term cardiac memory induced by ventricular pacing. *Circulation* 2015;**132**: 1377–86.
16. Weiss JN, Qu Z, Chen PS, Lin SF, Karagueuzian HS, Hayashi H et al. The dynamics of cardiac fibrillation. *Circulation* 2005;**112**:1232–40.
17. Taggart P, Sutton P, Chalabi Z, Boyett MR, Simon R, Elliott D et al. Effect of adrenergic stimulation on action potential duration restitution in humans. *Circulation* 2003;**107**:285–9.
18. Hao SC, Christini DJ, Stein KM, Jordan PN, Iwai S, Bramwell O et al. Effect of beta-adrenergic blockade on dynamic electrical restitution in vivo. *Am J Physiol Heart Circ Physiol* 2004;**287**:H390–4.
19. Buckley U, Yamakawa K, Takamiya T, Andrew Armour J, Shivkumar K, Ardell JL. Targeted stellate decentralization: implications for sympathetic control of ventricular electrophysiology. *Heart Rhythm* 2016;**13**:282–8.
20. Vaseghi M, Gima J, Kanaan C, Ajijola OA, Marmureanu A, Mahajan A et al. Cardiac sympathetic denervation in patients with refractory ventricular arrhythmias or electrical storm: intermediate and long-term follow-up. *Heart Rhythm* 2014;**11**:360–6.

## EP CASE EXPRESS

doi:10.1093/europace/euy190

Online publish-ahead-of-print 24 August 2018

# Cardioneuroablation in a patient with atrioventricular nodal re-entrant tachycardia

Tomas Roubicek<sup>1,2,3\*</sup>, Dan Wichterle<sup>2,3</sup>, and Josef Kautzner<sup>1,2,3</sup>

<sup>1</sup>Department of Cardiology, Regional Hospital Liberec, Czech Republic; <sup>2</sup>Department of Cardiology, Institute of Clinical and Experimental Medicine Prague, Czech Republic; and <sup>3</sup>Institute of Health Studies, Technical University of Liberec, Liberec, Czech Republic

\* Corresponding author. Tel: +420 60 430 6913; fax: +420 485 312 026. E-mail address: vroub@seznam.cz

We present the case of a 32-year-old female patient with a history of chronic fatigue resulting from functional disorder of the sinoatrial (SA) and atrioventricular (AV) nodes, in addition to palpitations due to paroxysmal supraventricular tachycardia. During electrophysiological study, significant sinus and junctional bradycardia were seen and typical AV nodal reentrant tachycardia (AVNRT) induced. Due to transient complete AV block following the first radiofrequency energy application at the slow pathway region, the procedure was abandoned. However, the patient was offered a repeat procedure aiming at modulating the SA and AV nodal function with cardioneuroablation, with subsequent ablation of AVNRT. At the beginning of this second procedure, typical AVNRT was repeatedly and very easily inducible. Radiofrequency ablation was delivered at the posterior cavoatrial junction, i.e. the site of the anterior right ganglionic plexus (Panel). The sinus rate accelerated from 40–60 to 80 b.p.m., the Wenckebach point increased from 80 to 130 b.p.m., and the inducibility of AVNRT significantly changed—isoproterenol challenge and two atrial extrastimuli were needed for induction. Finally, a single ablation lesion at the slow AV nodal pathway rendered the arrhythmia non-inducible. At 12 month follow-up, the patient remained completely asymptomatic, with no further palpitations and no significant fatigue. Limited cardioneuroablation ameliorated bradycardia-related symptoms and allowed uneventful AVNRT ablation.

The full-length version of this report can be viewed at: <https://www.escardio.org/Education/E-Learning/Clinical-cases/Electrophysiology>.

Published on behalf of the European Society of Cardiology. All rights reserved. © The Author(s) 2018. For permissions, please email: [journals.permissions@oup.com](mailto:journals.permissions@oup.com).

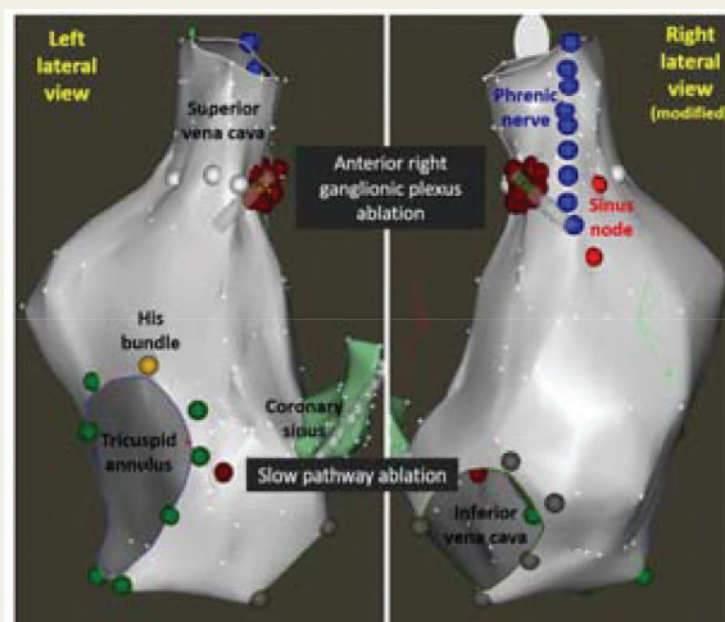

Source: http://academic.oup.com/europace/article-pdf/20/12/2044/26926958/euy190.pdf
